# Supplementary material for: Enhancing tomato quality, high sugar content and GABA accumulation, with mutations in ESKs and GAD3 genes
Source: Research Square preprint supplement (doi:10.21203/rs.3.rs-7220491/v1), 2025-08-13
Supplement: Supplementary file 1 [file bbefe86fbbdc960cf2afdae7.docx]

**Supplementary file**

**Supplementary Table 1. List of premiers and templates to amplify DNA by PCR.**

| No. | Template | Primer_forward | Sequence(5`→3`) | Primer_reverse | Sequence(5`→3`) |
| --- | --- | --- | --- | --- | --- |
| 1 | pBYR2HS-U6GAD | pPcUf-AtU6pro-F | ccaagctccaattagggccc cgtacgaccctcctgcagttcc | space-U6end-R | tgctagactagtcggttcg cgcagatttgcatccaaaac |
| 2 | PRI201-AN | Nost-F | atcccgggagtgatcgttc aaacatttggcaataaag | PcUbi-Nost-R | cgttgctagggcgcgccga tctagtaacatagatgacacc |
| 3 | SlESK-target2 | space-U6-26-F | ccgactagtctagcaagc ttcctttttttcttcttcttcgttc | SlHWS-target6R | ctcaagcagatcatcccat tcaatcactacttcgactctagc |
| 4 | SlESK-target2 | SlHWS-target6F | aatgggatgatctgcttgagg ttttagagctagaaatagcaag | Nost-U6-endR | gatcactcccgggatttcg cgcagatttgcatccaaaac |
| 5 | pPcUf-SlESKGAD3 | XmaⅠ-U6(26)-F | tgcgcgaaatcccgg ctttttttcttcttcttcgttc | U6-ESKtarget1-R | agagactgttctttacccaac aatcactacttcgactctagc |
| 6 | pPcUf-SlESKGAD3 | ESKtarget1-gRNA-F | ttgggtaaagaacagtctct gttttagagctagaaatagcaag | U6end-XmaI-R | aacgatcactcccgggttcg cgcagatttgcatccaaaac |

**Supplementary Table 2. List of primers to amplify DNA region from tomato genome.**

| No. | Primer_Forward | Sequnece(5`→3`) | Primer_reverse | Sequence(5`→3`) |
| --- | --- | --- | --- | --- |
| 1 | SlGAD3-multiF | cccgaaccctagcagatcgtcttg | SlGAD3-multiR | tcttccaaaactcagcaattgccc |
| 2 | ESK1-target2-multinaF | cagtacacgtaccccttgataga | ESK1-target2-multinaR | caggcatgatgatcctgttcaat |
| 3 | ESK2-target2-multinaF | ctcatataaaataagaccgaggg | ESK2-target2-multinaR | caggcatgatgattctgttcaag |
| 4 | ESK3-target2-multinaF | attcttttcaaatctacttatgg | ESK3-target2-multinaR | tgattctggcatgatgagtctgg |
| 5 | ESK1-target1-multinaF | gaggactccatgtatcagaactg | ESK1-target1-multinaR | caagcagcaactttgctttaaac |
| 6 | ESK2-target1-multinaF | gttacttgcttgaggaatggaag | ESK2-target1-multinaR | cgtaatagctgacaaatacctcc |
| 7 | ESK3-target1-multinaF | gtttttgataatgttactcatcc | ESK3-target1-multinaR | agtaaaacagatagatcgaaacg |
| 8 | M13-47 | cgccagggttttcccagtcacgac | RV-P | ggaaacagctatgaccatgattac |
| 9 | PrimerCheck11-F | gttttcccagtcacgacgtt | Nos-seqR | accggcaacaggattcaatc |
| 10 | PcUbiCheck2-F | tcagatcccctcttccttca | fcoCAS9Check2-R | gtgtccttggagagctggag |
| 11 | fcoCAS9Check3-F | atcctcctctccgacatcct | fcoCAS9Check3-R | agcttctcgttctggagctg |
| 12 | fcoCAS9Check3.5-F | gcgacatgtacgtcgaccag | fcoCAS9Check3.5-R | gacggagtaggcgacggtag |
| 13 | fcoCAS9Check4-F2 | atcaccatcatggagcgctc | fcoCAS9Check4-R2 | acttgtggccgtttacgtcg |
| 14 | gfbsd2Check5-F | cacatgaagcagcacgactt | CaMV35sCheck5-R | gatttcagcgtgtcctctcc |
| 15 | NPTIICheck6-F | agacaatcggctgctctgat | PpcUfcoCas9Check6-R | gcaacgctctgtcatcgtta |
| 16 | AminoPhoCheck7-F | gaaagctgcctgttccaaag | pBR322Check7-R | agctcactcaaaggcggtaa |
| 17 | pBR322Check8-F | gagtcagtgagcgaggaagc | pVS1Check8-R | gattggatgtaccgcgagat |
| 18 | pVS1Check9-F | ggtatcggttcatggattcg | pVS1Check9-R | gagctgcccattcttgagtc |
| 19 | pVS1Check10-F | acccgcctttctggttaagt | PrimerCheck10-R | ctggcgtaatagcgaagagg |
| 20 | HWS-offcheck-1F | tatgttggcagctggccttg | HWS-offcheck-1R | tgcagtgtagccacgtacag |
| 21 | GAD3-offcheck-1F | accagccgagatcattaggc | GAD3-offcheck-1R | tgccacttcctcaatggtcc |
| 22 | ESKtar1-offcheck-1F2 | gagtttgagaaggatggaggc | ESKtar1-offcheck-1R2 | gccattgccatatcatcagcc |
| 23 | ESKtar1-offcheck-2F | ccacagagtctgaagaaacagg | ESKtar1-offcheck-2R | ctgattccaatgccaatgc |
| 24 | ESKtar1-offcheck-3F | gaaccatgatctagggctcg | ESKtar1-offcheck-3R | tgatggtggaaactcccacc |
| 25 | ESKtar1-offcheck-4F | atggttgccctaacttggag | ESKtar1-offcheck-4R | accttgatgcaccaggatcc |
| 26 | ESKtar1-offcheck-5F | aactctctggcttctctgcc | ESKtar1-offcheck-5R | gcagaacaagtagctcccag |
| 27 | ESK1tar2-offcheck-1F | gtggtactcgaacctcctcc | ESK1tar2-offcheck-1R | tcatcacgtgcaatccaagc |
| 28 | ESK1tar2-offcheck-2F | tggtactcgaacctcctccg | ESK1tar2-offcheck-2R | gtaccaatggaagacccagc |
| 29 | *SlNCED*1-F | caacagcaaggaagaagacg | *SlNCED1*-R | tgcctccaacttcaaactca |

**Supplementary Table 3. Sequences of *eskgad3* lines in T0 generations.**

| line | Sample name | Target gene | Sequence | Mutation rate |
| --- | --- | --- | --- | --- |
| *esksgad3*  *esksgad3*  *esksgad3* | 58 | *GAD3* | CCCGAATGCCAAA---GTGG CCCGAATGCC---AAAGTGG | 1/4  1/4 |
| *ESK1*target | AGAG----TTCTTTACCCAA AGA----GTTCTTTACCCAA  AGA-----TTCTTTACCCAA | 1/4  1/4  2/4 |
| *ESK2*target1 | AGAAGACTGTTCTTTACCCAA AGA------TCTTTACCCAA | 3/4  1/4 |
| *ESK3*target1 | AGAAGACTGTTCTTTACCCAA AGA------TCTTTACCCAA | 2/4  2/4 |
| *ESK1*target2 | ATGCCACTGTGGA----TAC | 3/4 |
| 60 | *GAD3* | CCCGAATGCCAAAAAAGATGG | 1/4 |
| *ESK1*target1 | AGA—CTGTTCTTTACCCAA  --AGACTGTTCTTTACCCAA | 1/3  2/3 |
| *ESK2*target1 | AGA------TCTTTACCCAA | 4/4 |
| *ESK3*target1 | AG----TGTTCTTTACCCAA AGAG----TTCTTTACCCAA AGA----GTTCTTTACCCAA | 2/4  1/4  1/4 |
| *ESK1*target2 | 「ATGCCACTG-----------」-- ATGCCACT---------TAC  ATGCC------------AC | 2/4  1/4  1/4 |
| 69 | *GAD3* | CCCGAATGCCAAAAAAGATGG CCCGAATGCCAAAAAAGTTGG | 1/4  2/4 |
| *ESK1*target1 | AGATGACTGTTCTTTACCCAA | 3/4 |
| *ESK2*target1 | AGAAGACTGTTCTTTACCCAA | 1/3 |
| *ESK3*target1 | AGAAGACTGTTCTTTACCCAA AGA------TCTTTACCCAA | 3/6  2/6 |
| *ESK1*target2 | ATGCCACTGTGGA----TAC | 4/4 |
| 76 | *ESK1*target1 | AGATGACTGTTCTTTACCCAA | 3/4 |
| *ESK2*target1 | AGAAGACTGTTCTTTACCCAA AGA—CTGTTCTTTACCCAA  --AGACTGTTCTTTACCCAA | 2/4  1/4  1/4 |
| *ESK3*target1 | AGAAGACTGTTCTTTACCCAA  ---------「--AGACTGTTCTTTACCCAA」  -------「--AGACTGTTCTTTACCCAA」 | 2/4  1/4  1/4 |
| *ESK1*target2 | ATGCCACTGT-------TAC ATGCCA-------ATTTTAC | 1/4  1/4 |
| 91 | *GAD3* | CCCGAATGCCAA-----TGG | 1/3 |
| *ESK1*target1 | AGATGACTGTTCTTTACCCAA | 1/4 |
| *ESK2*target1 | AGAAGACTGTTCTTTACCCAA  -CAGACTGTTCTTTACCCAA | 1/4  3/4 |
| *ESK3*target1 | AGA-ACTGTTCTTTACCCAA | 4/4 |
| *ESK1*target2 | 「ATGCCACTGTGG--------」--GGC | 4/4 |
| 102 | *GAD3* | CCCGAATGCCAAAAAAGGTGG | 2/3 |
| *ESK1*target1 | AGA----------TACCCAA | 4/4 |
| *ESK2*target1 | AGA----------TACCCAA  A-----TATTCTTTACCCAA  AGA-----TTCTTTACCCAA | 2/4  1/4  1/4 |
| *ESK3*target1 | AGAG----TTCTTTACCCAA | 4/4 |
| *ESK1*target2 | ATGCCACTGTGGAAT---AC | 4/4 |
| 105 | *ESK1*target1 | AGA-----TTCTTTACCCAA | 1/2 |
| *ESK2*target1 | AGA----GTTCTTTACCCAA  AGA--------------CAA  AGAG----TTCTTTACCCAA | 1/4  2/4  1/4 |
| *ESK3*target1 | AGA-----------ACCCAA  AGA--CTGTTCTTTACCCAA  AGA--CGGTTCTTTACCCAA | 2/4  1/4  1/4 |
| 127 | *GAD3* | CCCGAATGCCAAA----TGG CCCGAATGCCAAAAAAGTTGG CCCGAATGCCAAAAGAGTTGG | 2/4  1/4  1/4 |
| *ESK1*target1 | AGA-----TTCTTTACCCAA  AGA-----TTCTGTACCCAA | 3/4  1/4 |
| *ESK2*target1 | AGAAGACTGTTCTTTACCCAA AGA------TCTTTACCCAA | 2/4  2/4 |
| *ESK3*target1 | AGA-----TTCTTTACCCAA | 4/4 |
| 150 | *ESK1*target1 | AGA--CTGTTCTTTACCCAA | 4/4 |
| *ESK2*target1 | AGA----GTTCTTTACCCAA AGAG----TTCTTTACCCAA | 1/2  1/2 |
| *ESK3*target1 | AGA--CTGTTCTTTACCCAA | 2/2 |
| *ESK1*target2 | ATGCCACTGTGGAAT---AC | 3/4 |
| 152 | *ESK2*target1 | --AGACTGTTCTTTACCCAA | 1/2 |

**Supplementary Table 4. Sequences of *eskgad3* lines in T1 generations.**

| line | Sample name | Target gene | Sequence |
| --- | --- | --- | --- |
| *esksgad3* | 76-1 | *ESK1*target1 | AGATGACTGTTCTTTACCCAA |
| *ESK2*target1 | --AGACTGTTCTTTACCCAA |
| *ESK3*target1 | hetero |
| 76-2 | *ESK1*target1 | AGATGACTGTTCTTTACCCAA |
| *ESK2*target1 | hetero |
| *ESK3*target1 | hetero |
| *ESK1*target2 | hetero |
| 76-3 | *ESK1*target1 | AGATGACTGTTCTTTACCCAA |
| *ESK2*target1 | AGAAGACTGTTCTTTACCCAA |
| *ESK3*target1 | ---------「--GACTGTTCTTTACCCAA」 |
| *ESK1*target2 | ATGCCACTGTG-------TTAC |
| 76-4 | *ESK1*target1 | AGATGACTGTTCTTTACCCAA |
| *ESK2*target1 | --AGACTGTTCTTTACCCAA |
| *ESK3*target1 | AGAAGACTGTTCTTTACCCAA |
| *ESK1*target2 | ATGCCACTGTGGA----TAC |
| 76-5 | *ESK1*target1 | AGATGACTGTTCTTTACCCAA |
| *ESK2*target1 | hetero |
| *ESK3*target1 | hetero |
| *ESK1*target2 | hetero |
| *esksgad3* | 76-6 | *ESK1*target1 | AGATGACTGTTCTTTACCCAA |
| *ESK2*target1 | --AGACTGTTCTTTACCCAA |
| *ESK3*target1 | ---------「--GACTGTTCTTTACCCAA」 |
| *ESK1*target2 | ATGCCACTG-------TTAC |
| 76-7 | *ESK1*target1 | AGATGACTGTTCTTTACCCAA |
| *ESK2*target1 | --AGACTGTTCTTTACCCAA |
| *ESK3*target1 | AGAGACTGTTCTTTACCCAA |
| *ESK1*target2 | hetero |
| 76-8 | *ESK1*target1 | AGATGACTGTTCTTTACCCAA |
| *ESK2*target1 | hetero |
| *ESK3*target1 | AGAGACTGTTCTTTACCCAA |
| *ESK1*target2 | ATGCCACTG-------TTAC |
| 76-9 | *ESK1*target1 | AGATGACTGTTCTTTACCCAA |
| *ESK2*target1 | AGAAGACTGTTCTTTACCCAA |
| *ESK3*target1 | ---------「--GACTGTTCTTAACACTG」 |
| *ESK1*target2 | hetero |
| 76-10 | *ESK1*target1 | AGATGACTGTTCTTTACCCAA |
| *ESK2*target1 | hetero |
| *ESK3*target1 | hetero |
| 76-11 | *ESK1*target1 | AGATGACTGTTCTTTACCCAA |
| *ESK2*target1 | hetero |
| *ESK3*target1 | TTAGACTGT-----------」--- |
| *ESK1*target2 | ATGCCACTG-------TTAC |
| 102-6 | *ESK3*target1 | hetero |
| 102-10 | *ESK2*target1 | hetero |
| 105-1 | *ESK1*target1 | hetero |
| 105-2 | *ESK1*target1 | hetero |
| *ESK3*target1 | AGA--C---------CCCAA |
| 105-3 | *ESK1*target1 | AGA-----TTCTTTACCCAA |
| *ESK2*target1 | hetero |
| *ESK3*target1 | --AGACTGTTCTTTACCCAA |
| 105-4 | *ESK1*target1 | hetero |
| *ESK2*target1 | hetero |
| *ESK3*target1 | --AGACTGTTCTTTACCCAA |
| 105-5 | *ESK1*target1 | AGATAC-GCTCT--------」-TA |
| *ESK2*target1 | hetero |
| *ESK3*target1 | AGA--C---------CCCAC |
| *esksgad3* | 105-6 | *ESK1*target1 | hetero |
| *ESK2*target1 | AGA----GTTCTTTACCCAA |
| *ESK3*target1 | AGA--CT-TT-T---CCCAA |
| 105-7 | *ESK1*target1 | AGA-----TTCTGTACCCAA |
| *ESK2*target1 | hetero |
| *ESK3*target1 | hetero |
| 105-8 | *ESK1*target1 | AGA-----TTCTGTACCCAA |
| *ESK2*target1 | hetero |
| *ESK3*target1 | hetero |
| 127-1 | *GAD3* | CCCGAATGCCAAAAAAGTTGG |
| *ESK1*target1 | AGA-----TTCTTTACCCAA |
| *ESK2*target1 | hetero |
| *ESK3*target1 | AGA-----TTCTTTACCCAA |
| 127-2 | *GAD3* | CCCGAATGCCAAA----TGG |
| *ESK1*target1 | AGA-----TTCTTTACCCAA |
| *ESK2*target1 | mono |
| *ESK3*target1 | AGA-----TTCTTTACCCAA |
| 127-3 | *GAD3* | CCCGAATGCCAAA----TGG |
| *ESK2*target1 | AGAAGACTGTTCTTTACCCAA |
| *ESK3*target1 | AGA-----TTCTTTACCCAA |
| 127-4 | *GAD3* | CCCGAATGCCAAAAAAGTTGG |
| *ESK1*target1 | AGA-----TTCTTTACCCAA |
| *ESK2*target1 | hetero |
| *ESK3*target1 | AGA-----TTCTTTACCCAA |
| 127-5  (EG Line1) | *GAD3* | CCCGAATGCCAAA----TGG |
| *ESK1*target1 | AGA-----TTCTTTACCCAA |
| *ESK2*target1 | AGA------TCTTTACCCAA |
| *ESK3*target1 | AGA-----TTCTTTACCCAA |
| 127-6 | *GAD3* | CCCGAATGCCAAA----TGG |
| *ESK1*target1 | AGA-----TTCTTTACCCAA |
| *ESK2*target1 | hetero |
| *ESK3*target1 | AGA-----TTCTTTACCCAA |
| 127-7 | *GAD3* | CCCGAATGCCAAA----TGG |
| *ESK1*target1 | AGA-----TTCTTTACCCAA |
| *ESK2*target1 | AGAAGACTGTTCTTTACCCAA |
| *ESK3*target1 | AGA-----TTCTTTACCCAA |
| *esksgad3* | 127-8 | *GAD3* | hetero |
| *ESK1*target1 | AGA-----TTCTTTACCCAA |
| *ESK2*target1 | AGA------TCTTTACCCAA |
| *ESK3*target1 | AGA-----TTCTTTACCCAA |
| *ESK1*target2 | hetero |
| 127-9  (EG Line2) | *GAD3* | CCCGAATGCCAAAAAAGTTGG |
| *ESK1*target1 | AGA-----TTCTTTACCCAA |
| *ESK2*target1 | hetero |
| *ESK3*target1 | AGA-----TTCTTTACCCAA |
| 127-10 | *GAD3* | CCCGAATGCCAAA----TGG |
| *ESK1*target1 | AGA-----TTCTTTACCCAA |
| *ESK3*target1 | AGA-----TTCTTTACCCAA |
| 150-1 | *ESK1*target1 | hetero |
| *ESK2*target1 | AGAGA----TCTTTACCCAA |
| *ESK3*target1 | AGA----GTTCTTTACCCAA |
| *ESK1*target2 | hetero |
| 150-2 | *ESK1*target1 | hetero |
| *ESK2*target1 | AGA----GTTCTTTACCCAA |
| *ESK3*target1 | hetero |
| *ESK1*target2 | hetero |
| 150-3 | *ESK1*target1 | --AGACTGTTCTTTACCCAA |
| *ESK2*target1 | AGA----GTTCTTTACCCAA |
| *ESK3*target1 | --AGACTGTTCTTTACCCAA |
| *ESK1*target2 | ATGCCACTGTGGAA---TAC |
| 150-4 | *ESK1*target1 | hetero |
| *ESK2*target1 | AGA----GTTCTTTACCCAA |
| *ESK3*target1 | hetero |
| *ESK1*target2 | hetero |
| 150-5 | *ESK1*target1 | hetero |
| *ESK2*target1 | AGAGA----TCTTTACCCAA |
| *ESK3*target1 | hetero |
| *ESK1*target2 | ATGCCA--------------」-------------- |
| 150-6 | *ESK1*target1 | hetero |
| *ESK2*target1 | AGA----GTTCTTTACCCAA |
| *ESK3*target1 | AGA----GTTCTTTACCCAA |
| *ESK1*target2 | ATGCCA----------------」------------ |
| *esksgad3* | 150-7 | *ESK1*target1 | --AGACTGTTCTTTACCCAA |
| *ESK2*target1 | AGA----GTTCTTTACCCAA |
| *ESK3*target1 | --AGACTGTTCTTTACCCAA |
| *ESK1*target2 | ATGCCACTGTGGAA---TAC |
| 150-8 | *ESK1*target1 | hetero |
| *ESK2*target1 | AGA----GTTCTTTACCCAA |
| *ESK3*target1 | hetero |
| *ESK1*target2 | ATGCCA--------------」-------------- |
| 150-9 | *ESK1*target1 | hetero |
| *ESK2*target1 | AGAGA----TCTTTACCCAA |
| *ESK3*target1 | hetero |
| *ESK1*target2 | hetero |
| 150-10 | *ESK1*target1 | hetero |
| *ESK2*target1 | AGAGA----TCTTTACCCAA |
| *ESK3*target1 | hetero |

**Supplementary Table. 5 Sequences of EG Line 2 sibling.**

| line | Sample name | Target gene | Sequence |
| --- | --- | --- | --- |
| *esksgad3* (Sibling of Line 2) | 127-9-1 | *ESK2*target1 | hetero |
| 127-9-2 | AGA------TCTTTACCCAA |
| 127-9-3 | AGA------TCTTTACCCAA |
| 127-9-4 | AGAAGACTCTTCTTTACCCAA |
| 127-9-5 | hetero |
| 127-9-6 | hetero |
| 127-9-7 | hetero |
| 127-9-8 | hetero |
| 127-9-9 | hetero |
| 127-9-10 | AGA------TCTTTACCCAA |
| 127-9-14 | AGA------TCTTTACCCAA |
| 127-9-18 | hetero |
| 127-9-26 | AGA------TCTTTACCCAA |
| 127-9-29 | AGA------TCTTTACCCAA |
| 127-9-30 | hetero |
| 127-9-31 | hetero |

**Supplementary Table 6. Results of off-target**

| line | Sample name | Off-target candidate region | Sequence | Mutation |
| --- | --- | --- | --- | --- |
| *esksgad3* | 127-5  (Line1) | GAD3-off | CCCGAATCCAAACAAATGGGGG | N |
| ESKtarget1-off1 | TTGGAGAAAGAACAGTTCT | N |
| ESKtarget1-off2 | AAAGACTGTTCTTTGAGCCAA | N |
| ESKtarget1-off3 | TTGGGGAAAGAACAGTACT | N |
| ESKtarget1-off4 | TTGGGGAAAGAACAGTACT | N |
| ESKtarget1-off5 | AAGACTGTTCTTTGCCCCA | N |
| ESKtarget2-off1 | ATGCCATTGTGGAATTTAA | N |
| ESKtarget2-off2 | ATGCCATTGTGGAATTTAA | N |
| 127-9  (Line 2) | GAD3-off | CCCGAATCCAAACAAATGGGGG | N |
| ESKtarget1-off1 | TTGGAGAAAGAACAGTTCT | N |
| ESKtarget1-off2 | AAAGACTGTTCTTTGAGCCAA | N |
| ESKtarget1-off3 | TTGGGGAAAGAACAGTACT | N |
| ESKtarget1-off4 | TTGGGGAAAGAACAGTACT | N |
| ESKtarget1-off5 | AAGACTGTTCTTTGCCCCA | N |
| ESKtarget2-off1 | ATGCCATTGTGGAATTTAA | N |
| ESKtarget2-off2 | ATGCCATTGTGGAATTTAA | N |

**A**


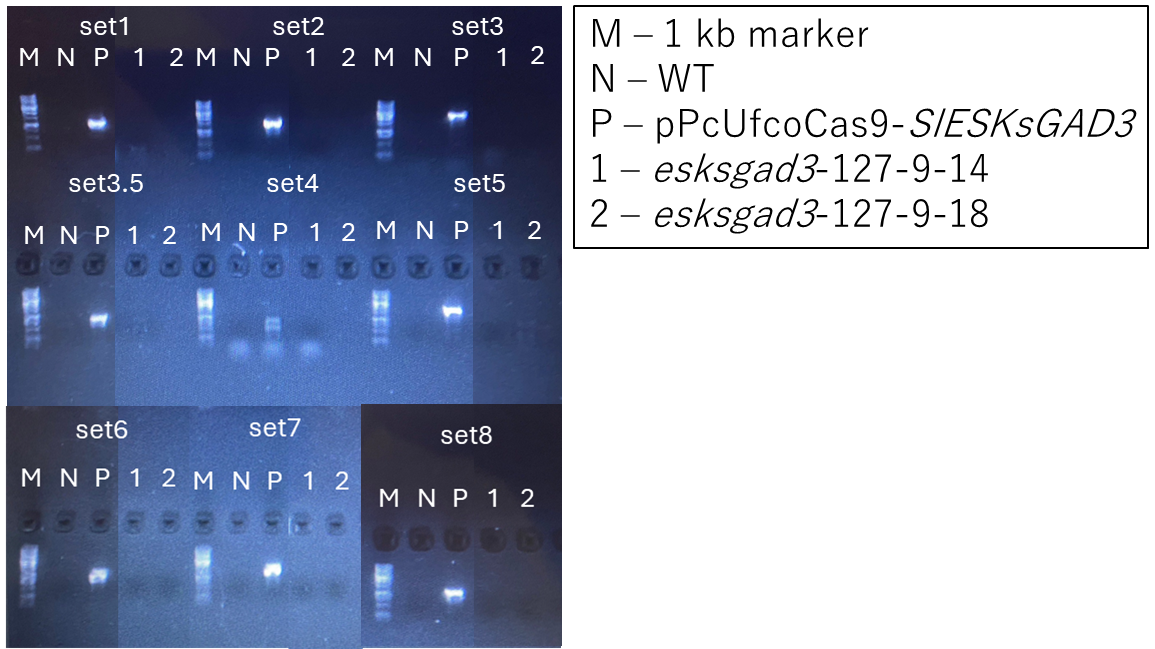


**B**

| Line | Sample name | Result(N,P) |
| --- | --- | --- |
| *esksgad3* | 127-5-3 | P |
| 127-5-6 | N |
| 127-5-13 | P |
| 126-5-14 | P |
| 127-5-15 | P |
| 127-9-2 | P |
| 127-9-4 | P |
| 127-9-10 | P |
| 127-9-14 | N |
| 127-9-18 | N |
| 127-9-26 | N |
| 127-9-29 | N |
| 127-9-30 | P |

**Supplementary Figure.1 (Result of foreign gene check)**

(A) Results of PCR for foreign gene check. M, maker 1kbp; N, negative control (Mili-Q); P, positive control (Vector for targeting *SlESK 1-3* and *SlGAD3*, the bands could be detected.); 1 and 2, samples (the bands couldn’t be detected). (B) Results of foreign gene check. The results were confirmed in the same way as (A). P, positive result of foreign gene; N, negative result of foreign gene. **
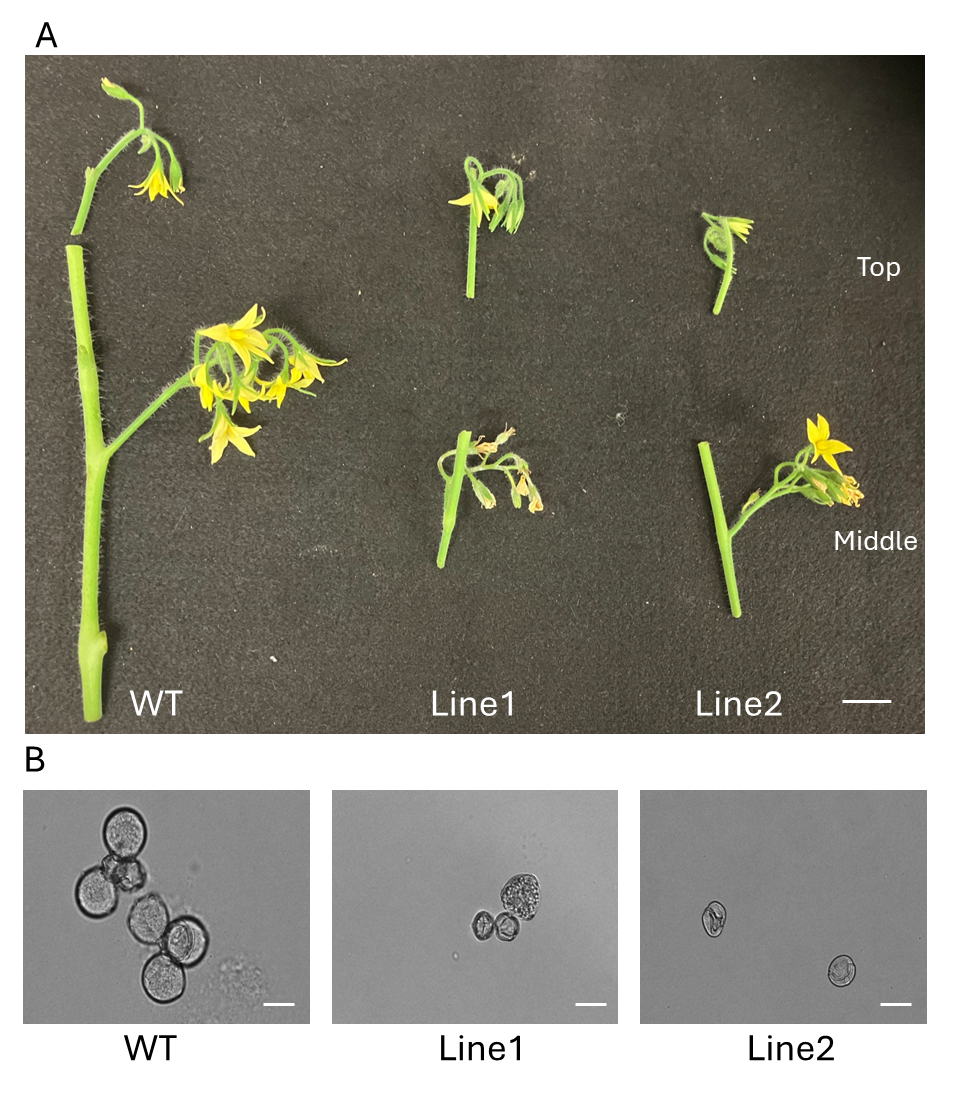
Supplementary Figure 2.** (A) An image of flower in WT and EG lines. Top indicates the flower which is top parts of plants and 10 days old flowers. Middle indicates the flower which is middle parts of plants and 20 days old flowers. (left: WT, middle: EG Line1, right: EG Line 2) (B) Illustrations of pollen in WT and EG lines. The pollens of WT are circled shape and identical size, while the pollens of EG lines are inconsistent shape and size. (Scale bar: 20μm)


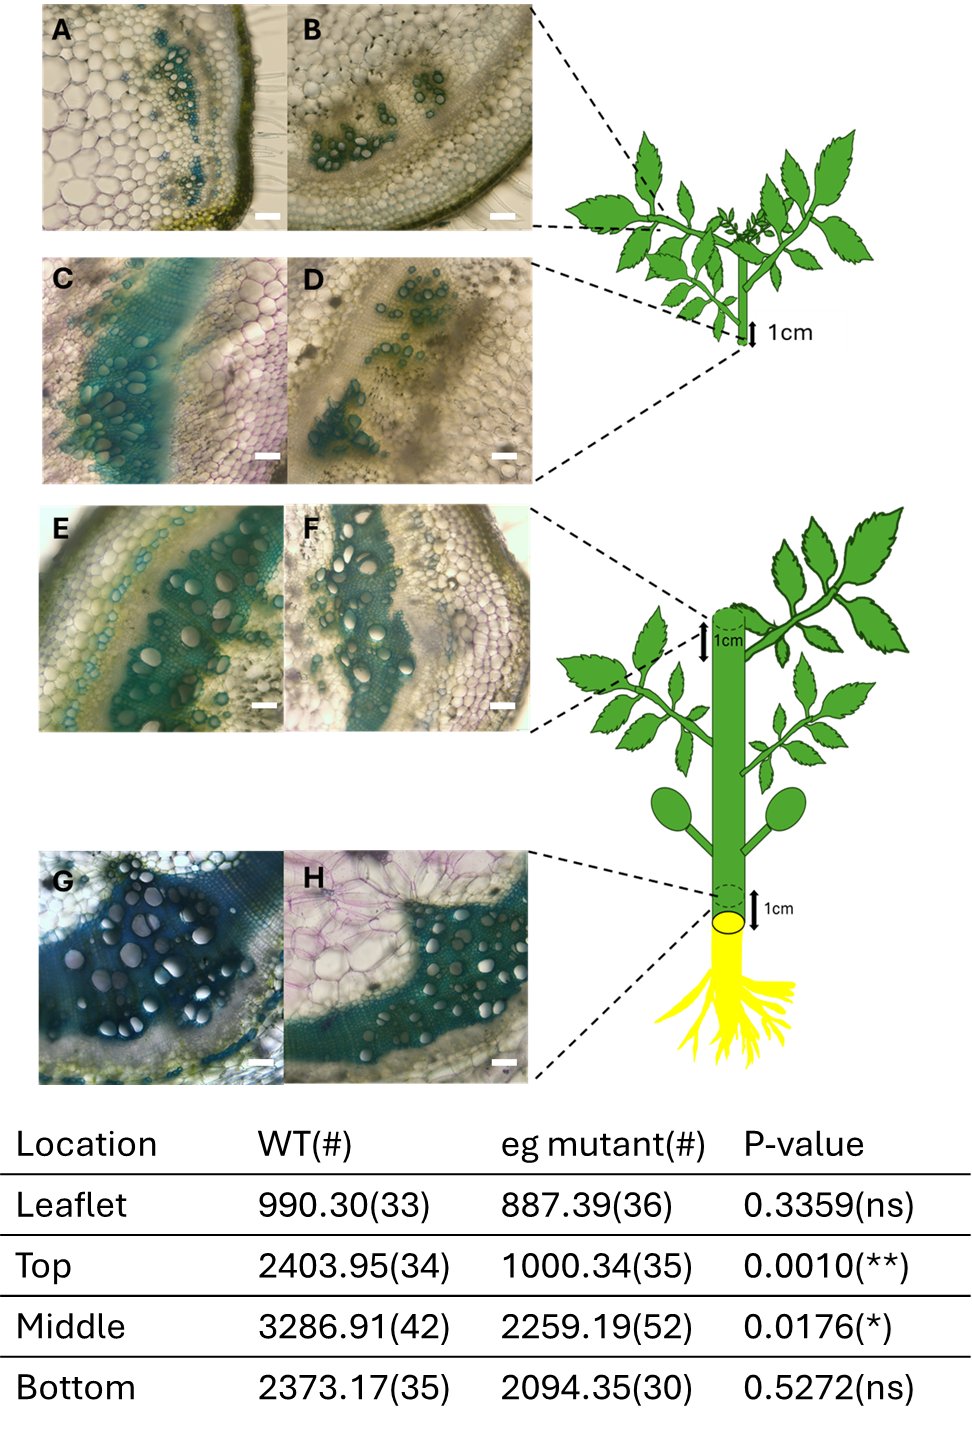

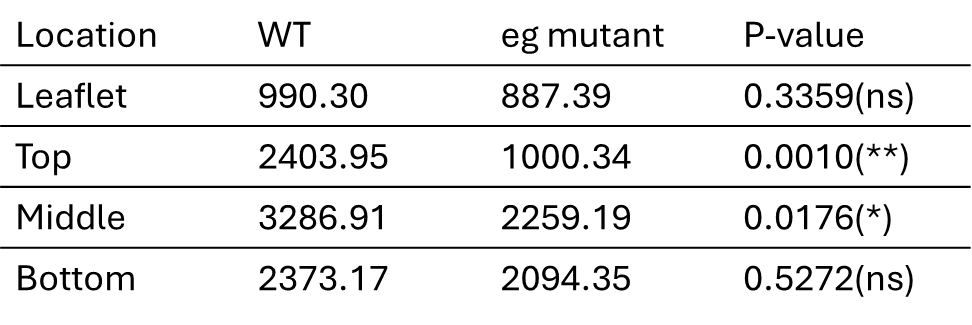


**I**

**Supplementary Figure 3.** (A-H) Xylem of stem (left: WT, right: EG Line 2) (Scale bar: 100μm) (A-B) Xylem of leaflet part. (C-D) Xylem of upper part. (E-F) Xylem of middle part. (G-H) Xylem of above part. (I) Average width of vessel (μm2). Statistical significance: ns, no significant difference; *, p < 0.05; *, p < 0.5; **).


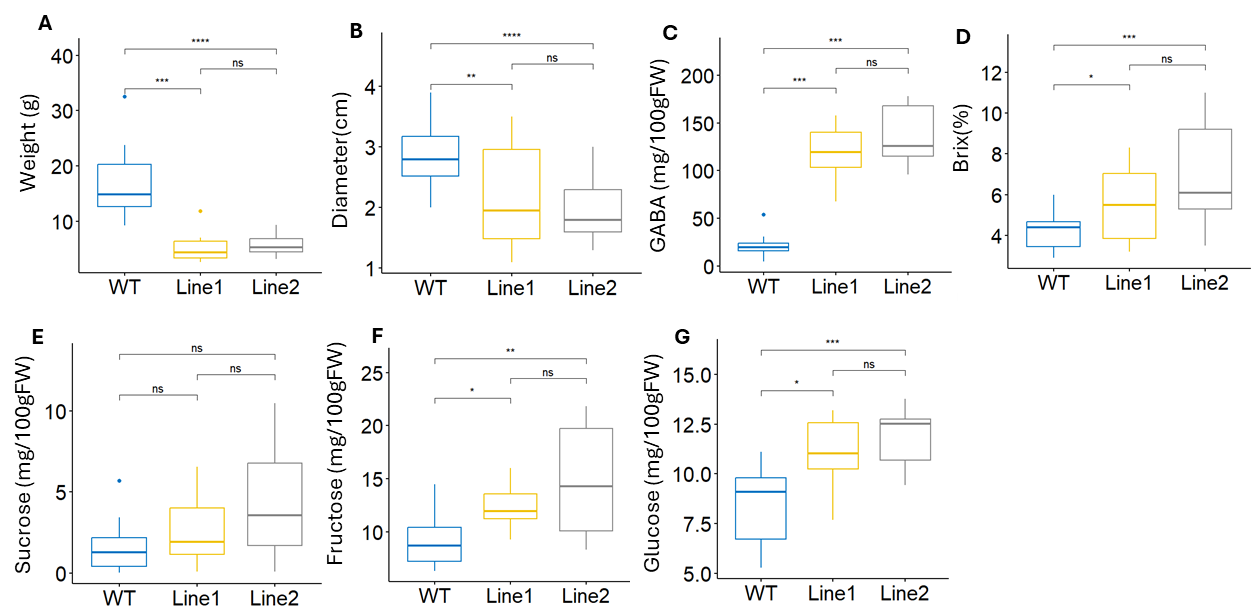


**Supplementary Figure 4. Parameter of fruits from WT and EG Lines (EG Line 1 and EG Line 2) during Summer season.**

(A)Fruit weight. (B) Fruit diameter. (C) GABA concentration in fruits. (D) Brix value of fruits. (E) Sucrose concentration in fruits. (F) Fructose concentration in fruits. (G) Glucose concentration in fruits. Statistical significance: ns, no significant difference; *, p < 0.05; *, p < 0.5; **, p < 0.01; ***, p < 0.001; ****, p < 0.0001.


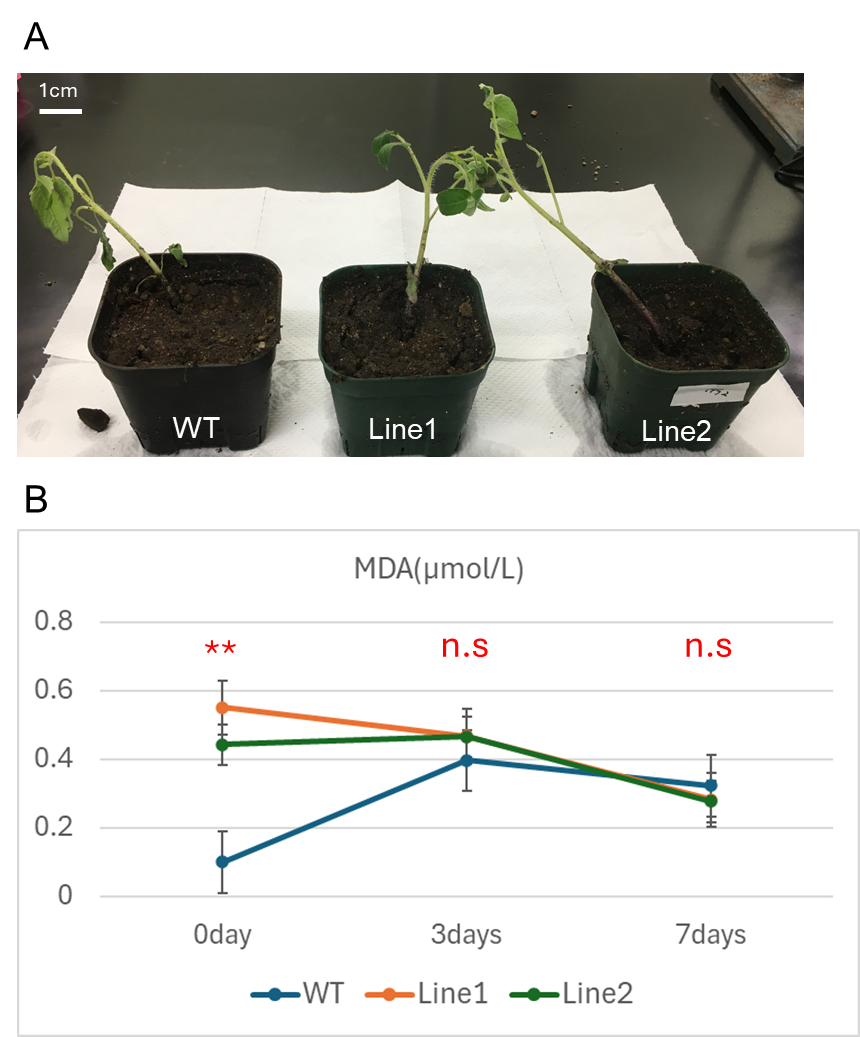


**Supplementary Figure 5. EG Line 1 and Line 2 didn’t exhibit cold stress tolerance.**

(A) Illustrates are of representative plants of WT and EG Line 1, EG Line 2 7 days after cold stress treatment. Scale bar represents 1 cm in length. (B) Concentration of MDA before stress (0 day) and after 3-days and 7-days the cold stress treatment. Statistical significance: ns, no significant difference; **, p < 0.01.


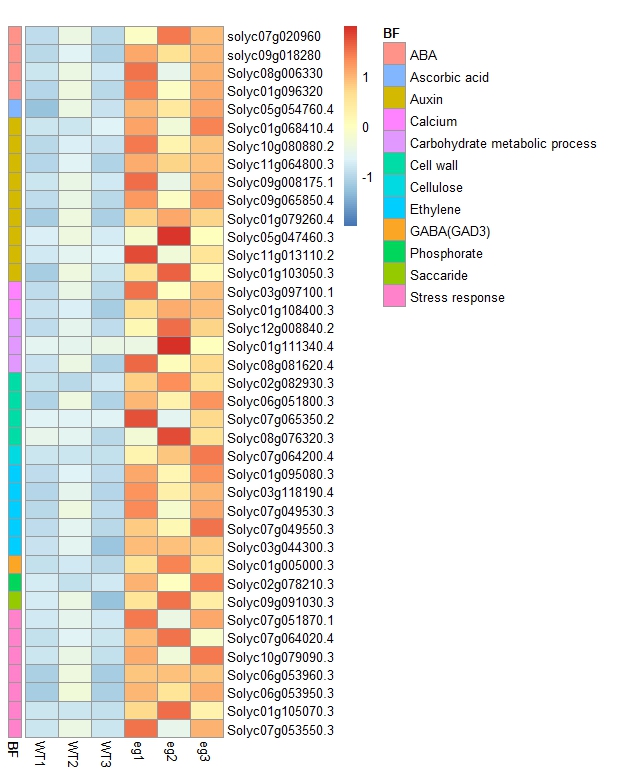


**Supplementary Figure 6.** Heatmap for representative up-regulated gene expression by RNA-seq for differentially expressed genes (DEGs) between WT and EG Line 2. Red is higher expression and blue is lower expression; DEGs defined as genes with a log base two fold change value less than -1 or greater than 1 and FDR adjusted p-value less than 0.05. BF represents biological function.


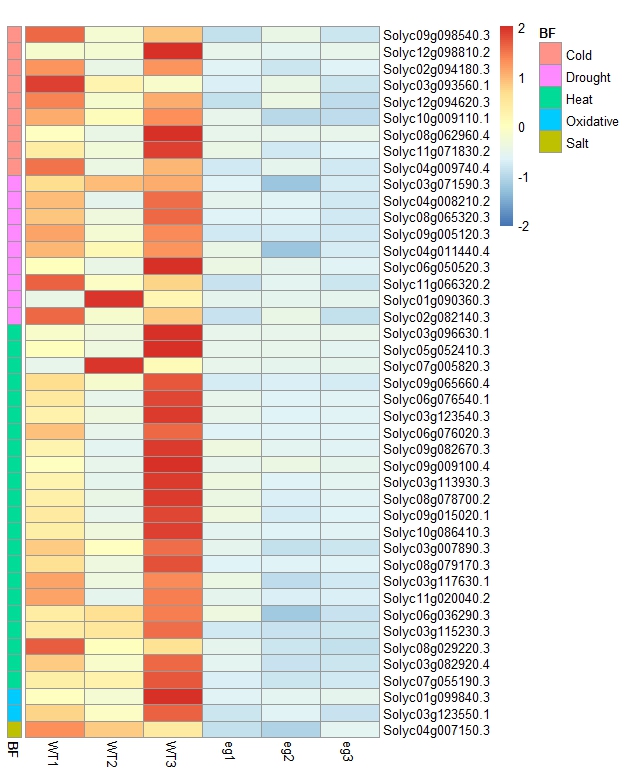

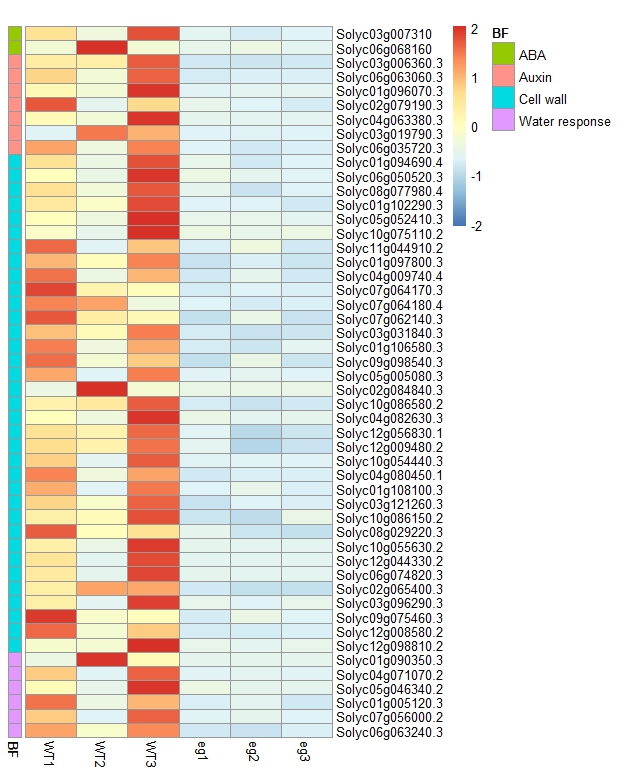

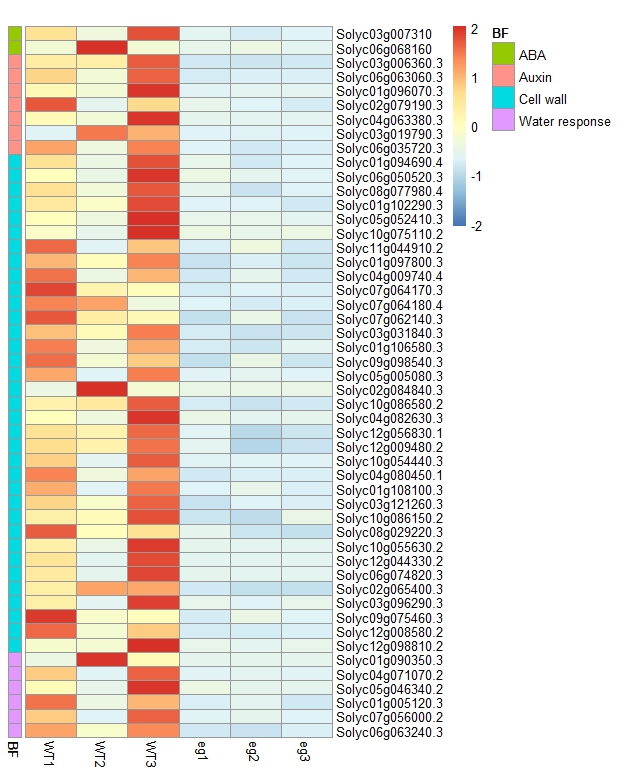

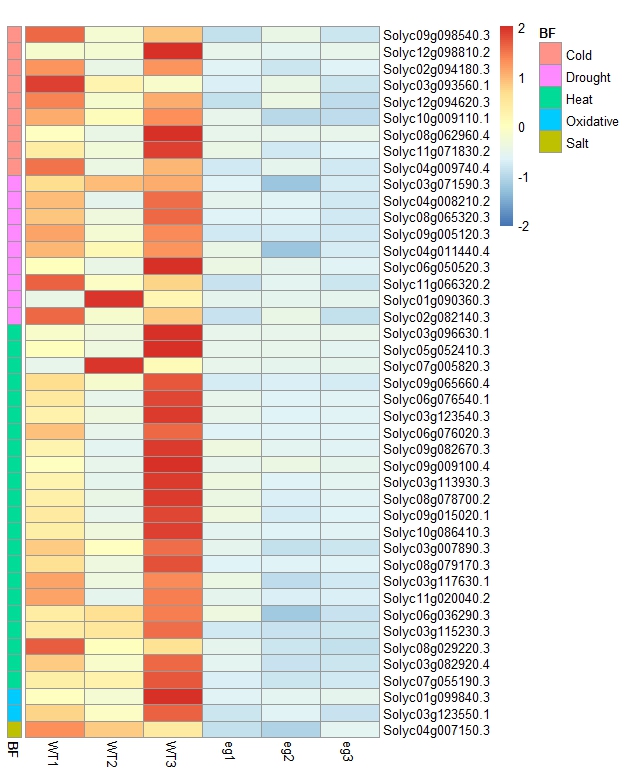


**Supplementary Figure 7.** Heatmap for representative down-regulated gene expression by RNA-seq for differentially expressed genes (DEGs) between WT and EG Line 2. Red is higher expression and blue is lower expression; DEGs defined as genes with a log base two fold change value less than -1 or greater than 1 and FDR adjusted p-value less than 0.05. BF represents biological function.
